# Supplementary material for: Effects of functional feeds on the lipid composition, transcriptomic responses and pathology in heart of Atlantic salmon (Salmo salar L.) before and after experimental challenge with Piscine Myocarditis Virus (PMCV)
Source: PubMed Central journal article supplement (PMC4079957; doi:10.1186/1471-2164-15-462), 2014-06-11

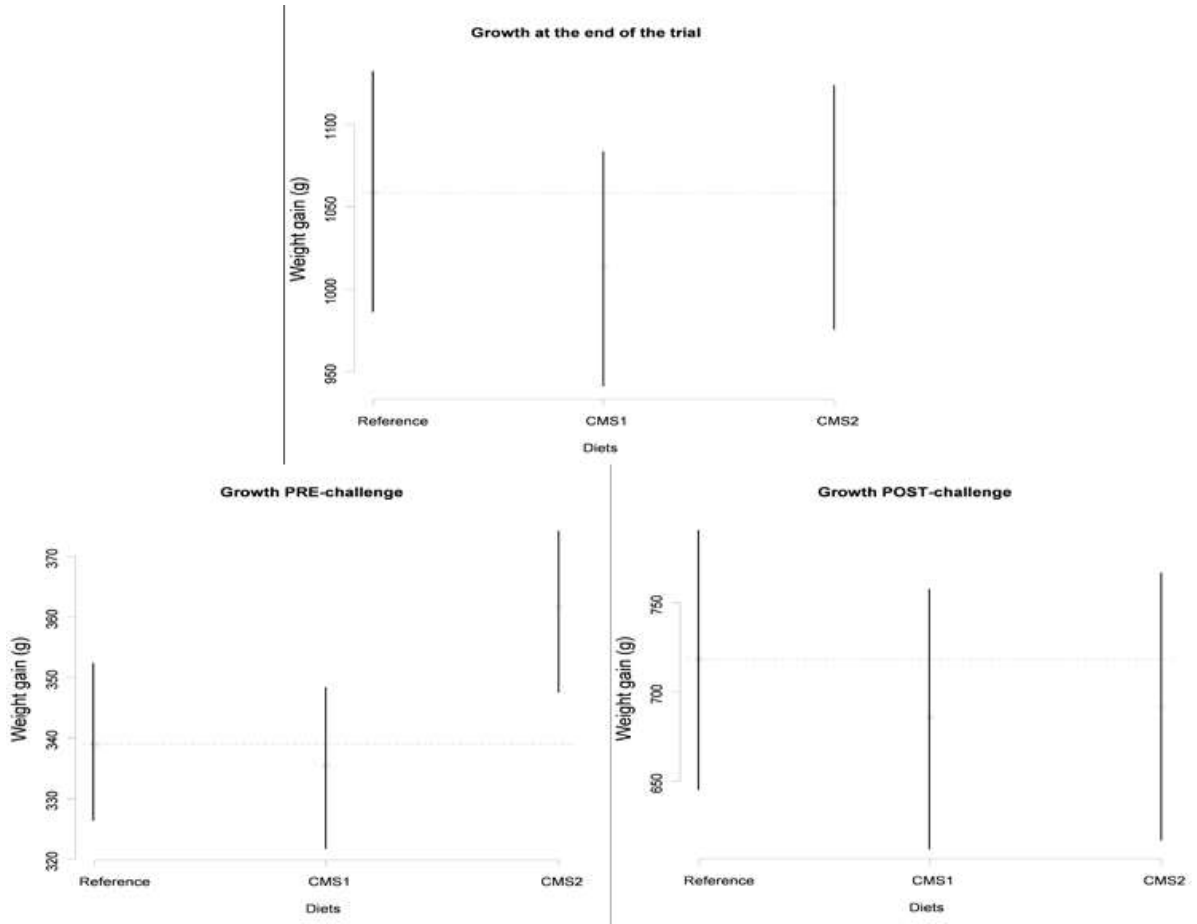

Supplement: 12864_2014_6183_MOESM2_ESM.pdf [file 12864_2014_6183_MOESM2_ESM.pdf]
