# Supplementary material for: Effects of functional feeds on the lipid composition, transcriptomic responses and pathology in heart of Atlantic salmon (Salmo salar L.) before and after experimental challenge with Piscine Myocarditis Virus (PMCV)
Source: Springer Nature journal article supplement (doi:10.1186/1471-2164-15-462), 2014-01-01

## Atrium histscores

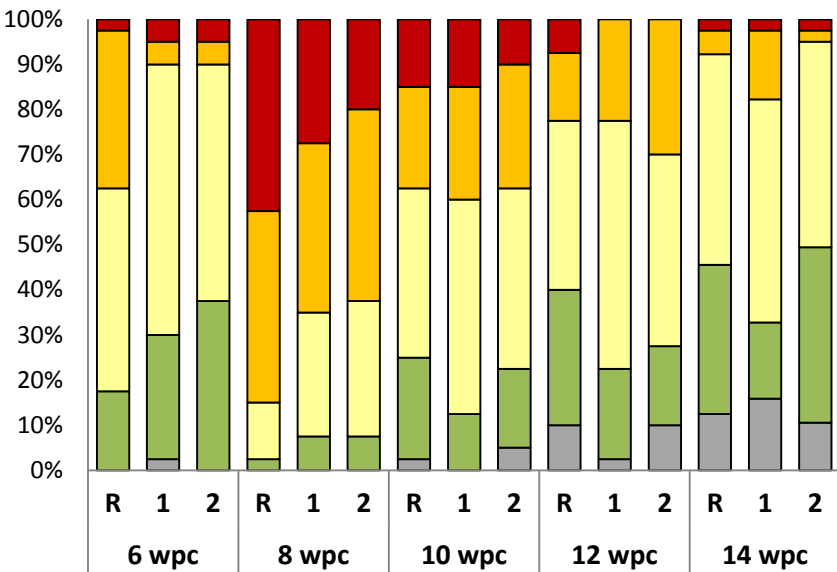

## Atrium Statistical model

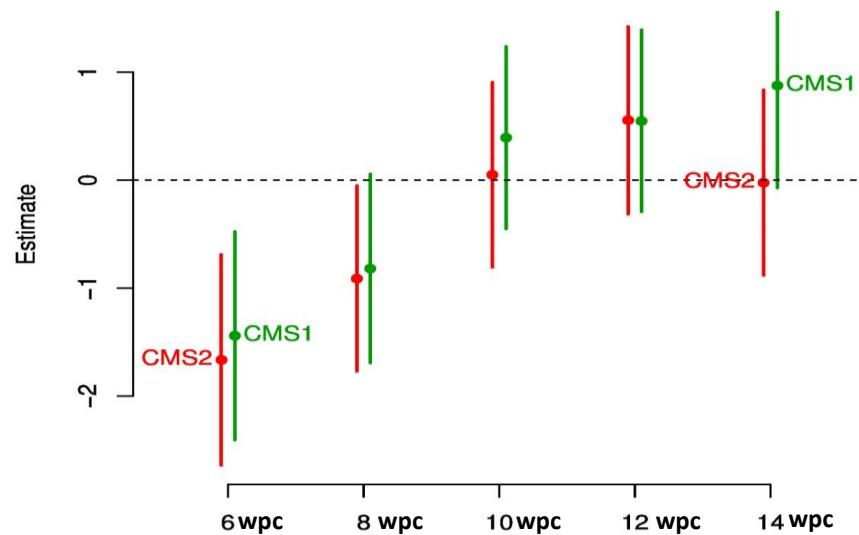

## Ventricle histscores

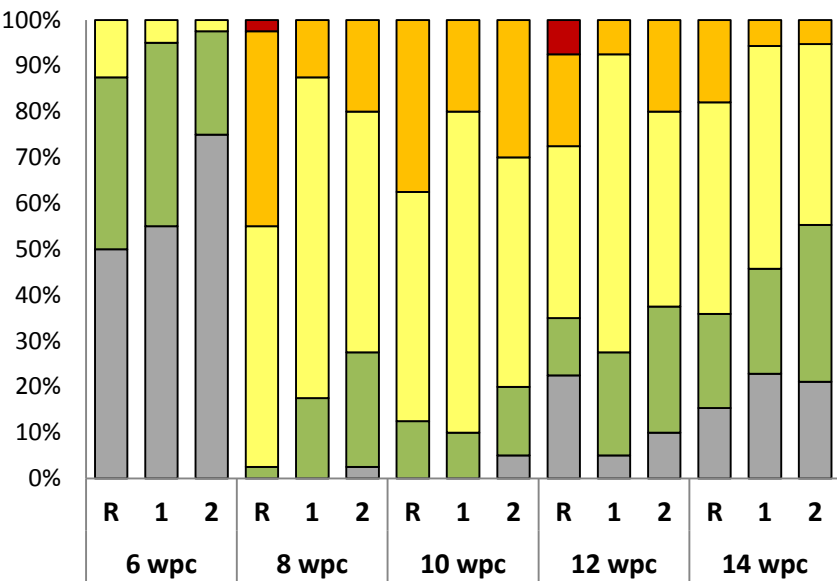

## Ventricle Statistical model

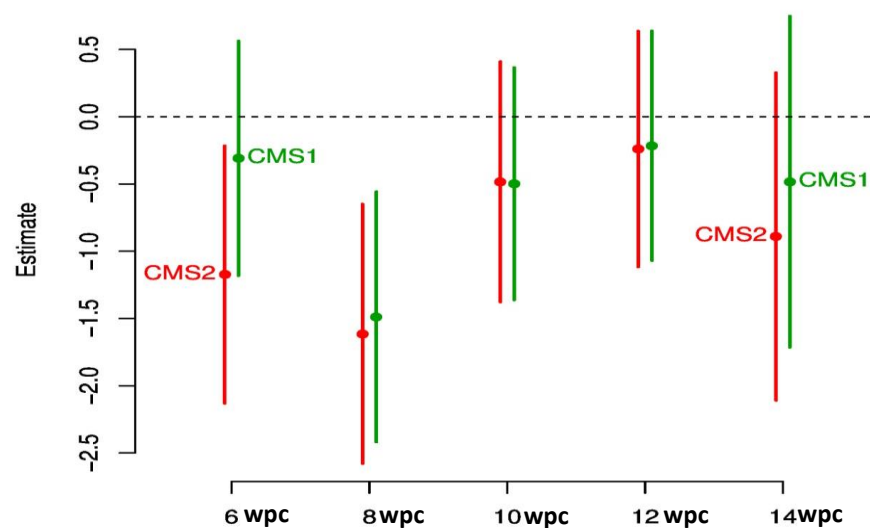

Supplement: 12864_2014_6183_MOESM6_ESM.pdf [file 12864_2014_6183_MOESM6_ESM.pdf]
