# Supplementary material for: Effects of functional feeds on the lipid composition, transcriptomic responses and pathology in heart of Atlantic salmon (Salmo salar L.) before and after experimental challenge with Piscine Myocarditis Virus (PMCV)
Source: Springer Nature journal article supplement (doi:10.1186/1471-2164-15-462), 2014-01-01
Supplement: 12864_2014_6183_MOESM12_ESM.pdf [file 12864_2014_6183_MOESM12_ESM.pdf]

| BlastxHit                                                  | Probe name    | PreCh    |          | 6 wpc    |          | 8 wpc    |          | 14 wpc   |          |
|------------------------------------------------------------|---------------|----------|----------|----------|----------|----------|----------|----------|----------|
|                                                            |               | CMS1-REF | CMS2-REF | CMS1-REF | CMS2-REF | CMS1-REF | CMS2-REF | CMS1-REF | CMS2-REF |
| Diacylglycerol O-acyltransferase homolog 1 (Mouse)         | Ssa#DY731573  | 0.55     | 0.07     | 1.80     | 0.58     | 0.63     | 2.03     | 0.33     | 0.15     |
| Phosphatidylinositol-4-phosphate 5-kinase_type I_alpha     | Omy#S34308961 | -0.69    | -1.51    | 1.09     | 0.76     | 0.68     | 0.50     | 0.20     | 0.59     |
| SH2 domain containing 5                                    | Ssa#DW178537  | 0.99     | 0.79     | 1.37     | 1.56     | 1.43     | 2.05     | -0.94    | -1.30    |
| Inositol 1_4_5-trisphosphate receptor-interacting protein  | Ssa#TC93931   | 1.39     | 1.27     | -0.28    | 1.36     | -0.25    | -0.75    | -0.14    | -0.35    |
| Phosphatidylinositol phosphate 5-kinase type III isoform d | Ssa#S30258921 | 0.06     | 0.16     | 0.48     | 0.59     | 0.91     | 0.88     | -0.45    | 0.08     |
| Tyrosine-protein kinase receptor                           | Omy#S15340917 | 0.70     | 0.43     | -1.01    | -1.06    | 0.94     | 1.67     | 0.85     | 0.62     |
| Tyrosine-protein phosphatase non-receptor type 12          | Ssa#CL279Ctg1 | -0.35    | 0.51     | 0.90     | 1.11     | 0.44     | 1.69     | 0.58     | 1.79     |
| Protein kinase C                                           | Omy#TC170368  | 0.68     | 1.69     | -0.07    | 0.23     | -0.76    | 0.78     | 0.06     | 0.32     |
