# Supplementary material for: Effects of functional feeds on the lipid composition, transcriptomic responses and pathology in heart of Atlantic salmon (Salmo salar L.) before and after experimental challenge with Piscine Myocarditis Virus (PMCV)
Source: Springer Nature journal article supplement (doi:10.1186/1471-2164-15-462), 2014-01-01

A

|                                                         | P-value<br>time | PreCh    |          | 6 wpc    |          | 8 wpc    |          | 14 wpc   |          |
|---------------------------------------------------------|-----------------|----------|----------|----------|----------|----------|----------|----------|----------|
|                                                         |                 | CMS1-REF | CMS2-REF | CMS1-REF | CMS2-REF | CMS1-REF | CMS2-REF | CMS1-REF | CMS2-REF |
| Salmo salar delta-6 fatty acyl desaturase (Fadsd6)      | 8.41E-09        | 0.66     | 0.33     | 1.27     | 1.73     | 0.05     | 0.37     | -1.29    | 0.82     |
| Salmo salar delta-6 fatty acyl desaturase (Fadsd6) gene | 4.44E-09        | 1.01     | -0.45    | 2.65     | 2.54     | 0.52     | 0.16     | -0.94    | -0.09    |
| Salmo salar delta-6 fatty acyl desaturase (Fadsd6) gene | 4.57E-10        | 0.47     | 0.05     | 1.81     | 1.74     | -0.08    | 1.27     | -1.33    | 0.36     |
| Delta-6 fatty acyl desaturase D6fad_a                   | 2.00E-04        | 1.00     | -1.90    | 1.53     | 2.06     | 1.16     | -0.36    | -0.61    | 0.10     |
| Salmo salar delta-6 fatty acyl desaturase (Fadsd6) gene | 2.18E-06        | -1.12    | -0.82    | 0.88     | 1.98     | -0.33    | -0.77    | -2.13    | -2.09    |

B

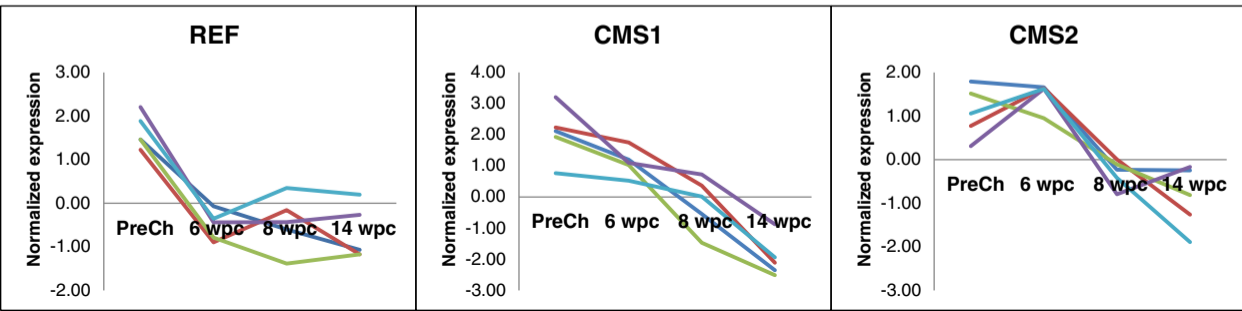

Supplement: 12864_2014_6183_MOESM13_ESM.pdf [file 12864_2014_6183_MOESM13_ESM.pdf]
