# Supplementary figures and images for: Effects of functional feeds on the lipid composition, transcriptomic responses and pathology in heart of Atlantic salmon (Salmo salar L.) before and after experimental challenge with Piscine Myocarditis Virus (PMCV)
Source: Springer Nature journal article supplement (doi:10.1186/1471-2164-15-462), 2014-01-01

**A**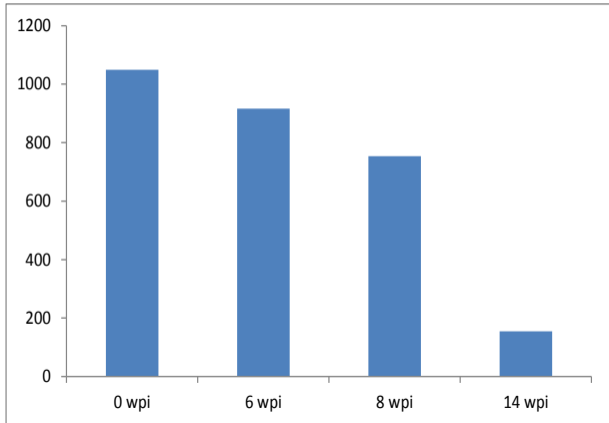**B**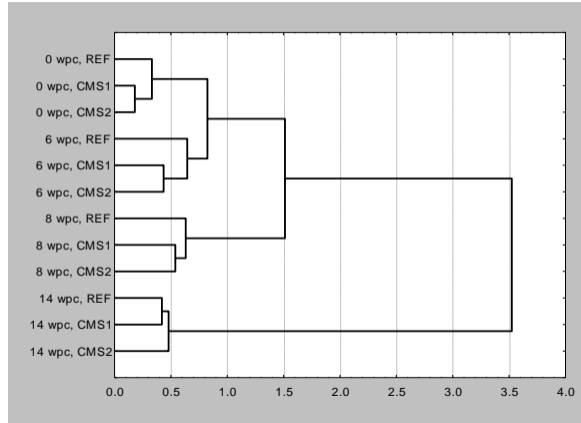

Supplement: 12864_2014_6183_MOESM10_ESM.pdf [file 12864_2014_6183_MOESM10_ESM.pdf]

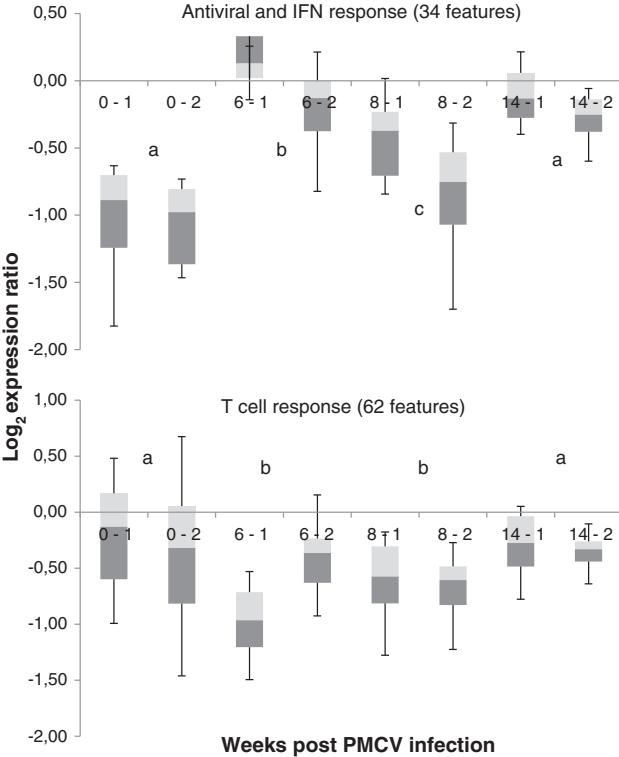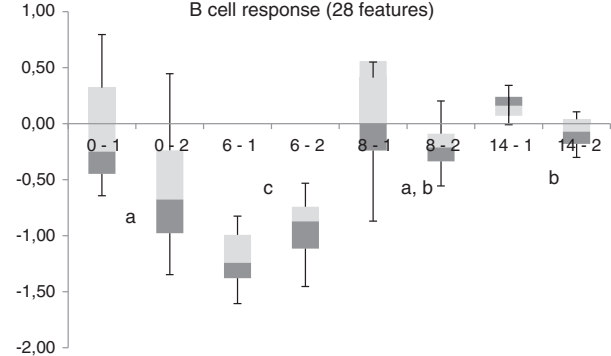

Supplement: 12864_2014_6183_MOESM11_ESM.pdf [file 12864_2014_6183_MOESM11_ESM.pdf]

## PE

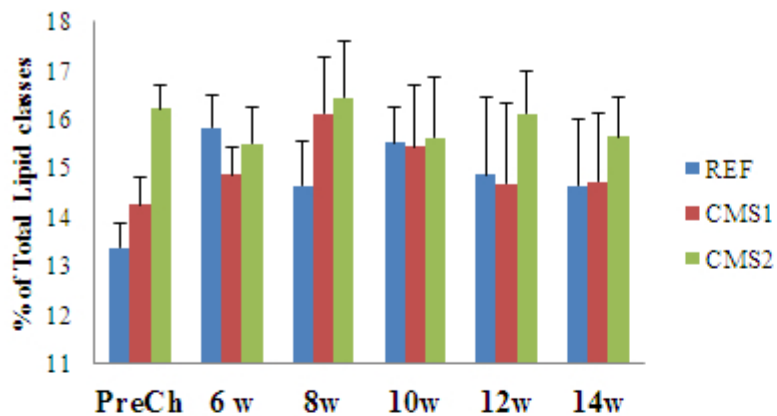

## PC

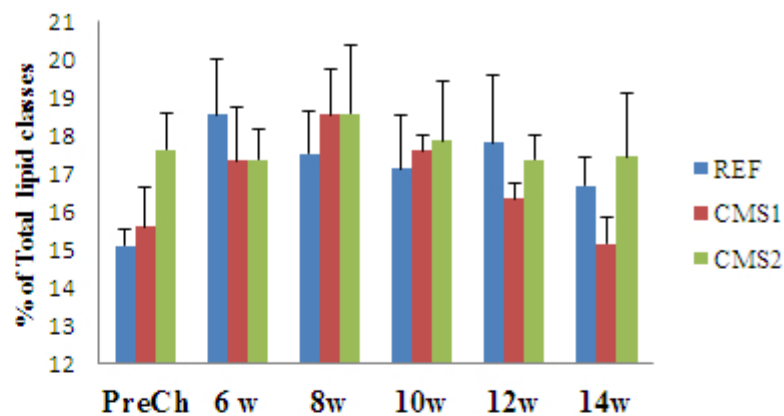

## PI

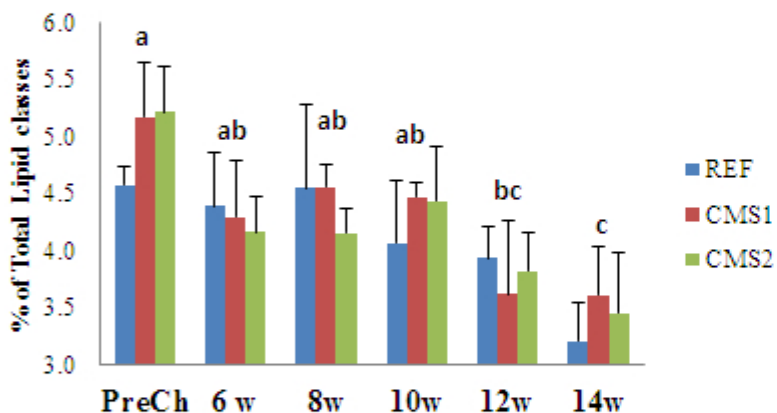

## PS

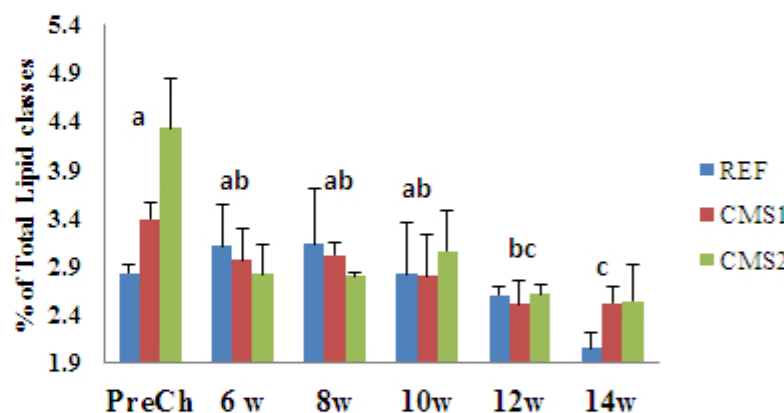

## Total phospholipids

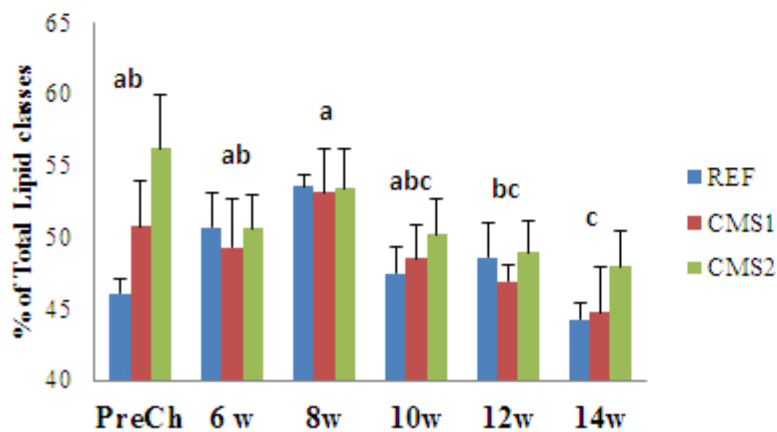

## TAG

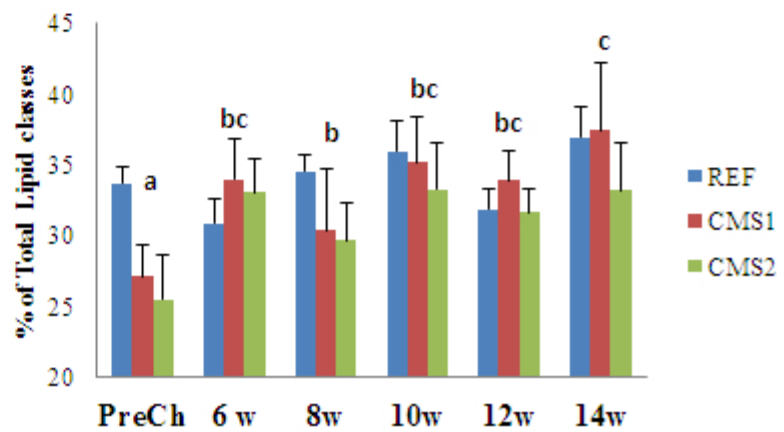

Supplement: 12864_2014_6183_MOESM5_ESM.pdf [file 12864_2014_6183_MOESM5_ESM.pdf]

# Liver histoscores

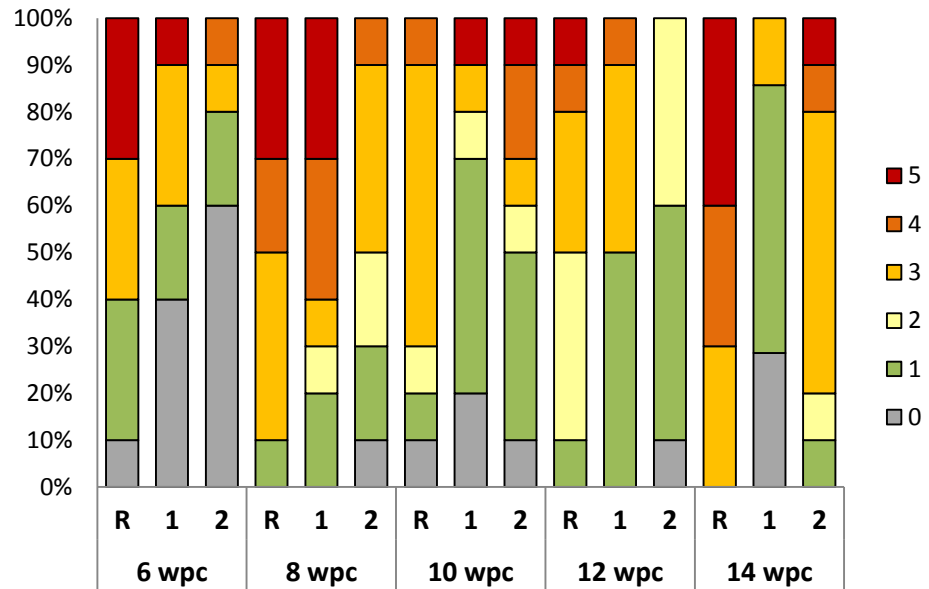

# Liver Statistical model

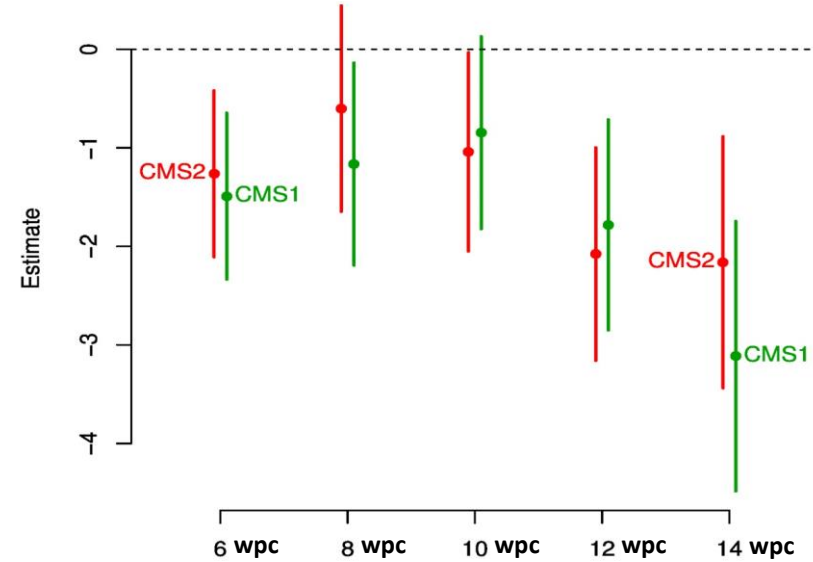

Supplement: 12864_2014_6183_MOESM7_ESM.pdf [file 12864_2014_6183_MOESM7_ESM.pdf]

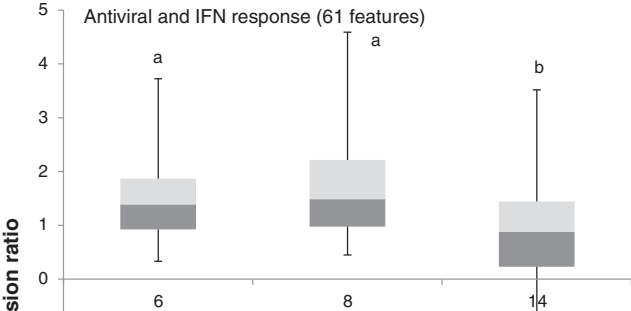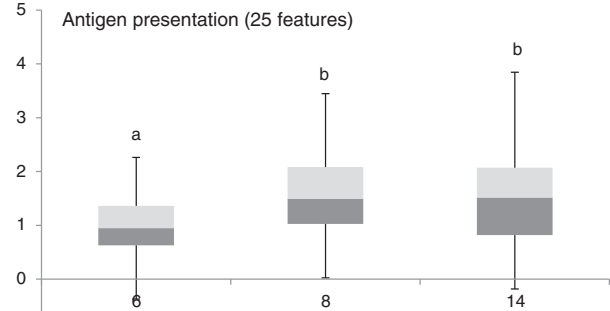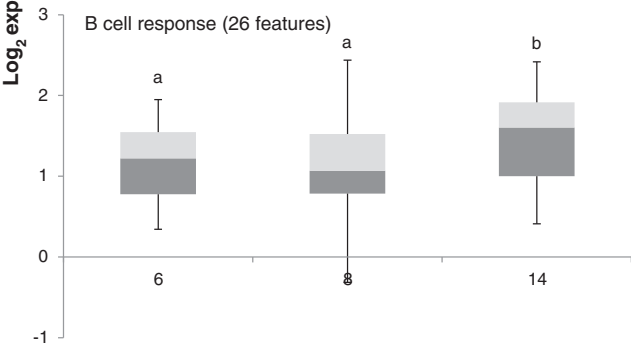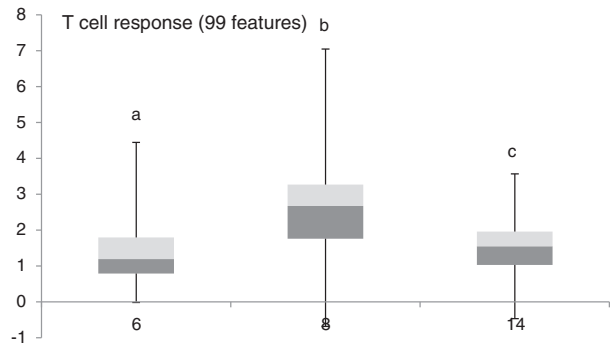

**Weeks post PMCV infection**

Supplement: 12864_2014_6183_MOESM9_ESM.pdf [file 12864_2014_6183_MOESM9_ESM.pdf]
